# Supplementary material for: Sodium Glucose Co-Transporter 2 Inhibitors Ameliorate Endothelium Barrier Dysfunction Induced by Cyclic Stretch through Inhibition of Reactive Oxygen Species
Source: MDPI journal article supplement (doi:10.3390/ijms22116044), 2021-06-03
Supplement: s1 [file s1]

## Supplementary Materials

### **Sodium glucose co-transporter 2 inhibitors ameliorate endothelium barrier dysfunction induced by cyclic stretch through inhibition of oxygen species**

*International Journal of Molecular Sciences*

Xiaoling Li<sup>1</sup>, Gregor Römer<sup>1,2</sup>, Raphaela P. Kerindongo<sup>1</sup>, Jeroen Hermanides<sup>1</sup>,  
Martin Albrecht<sup>2</sup>, Markus W. Hollmann<sup>1</sup>, Coert J. Zuurbier<sup>1</sup>, Benedikt Preckel<sup>1</sup>,  
Nina C. Weber<sup>1\*</sup>

<sup>1</sup>Amsterdam UMC, University of Amsterdam, Anesthesiology, Laboratory of Experimental Intensive Care and Anesthesiology, Amsterdam Cardiovascular Sciences, Amsterdam, The Netherlands

<sup>2</sup>Department of Anesthesiology and Intensive Care Medicine, Universitätsklinikum Schleswig-Holstein, Campus Kiel, Germany

\* Corresponding author: Nina C Weber, PhD

Department of Anesthesiology, Laboratory of Experimental Intensive Care and Anesthesiology (L.E.I.C.A.)

Amsterdam UMC, location Academic Medical Centre (AMC)

Address: Meibergdreef 9, Room M0-128

Amsterdam, Noord-Holland, 1105 AZ, The Netherlands

Tel.: +31 20 5668215

E-mail: N.C.Hauck@amsterdamumc.nl

**Figure S1**

*Cell permeability and VE-cadherin expression of cells under 5% stretch:*

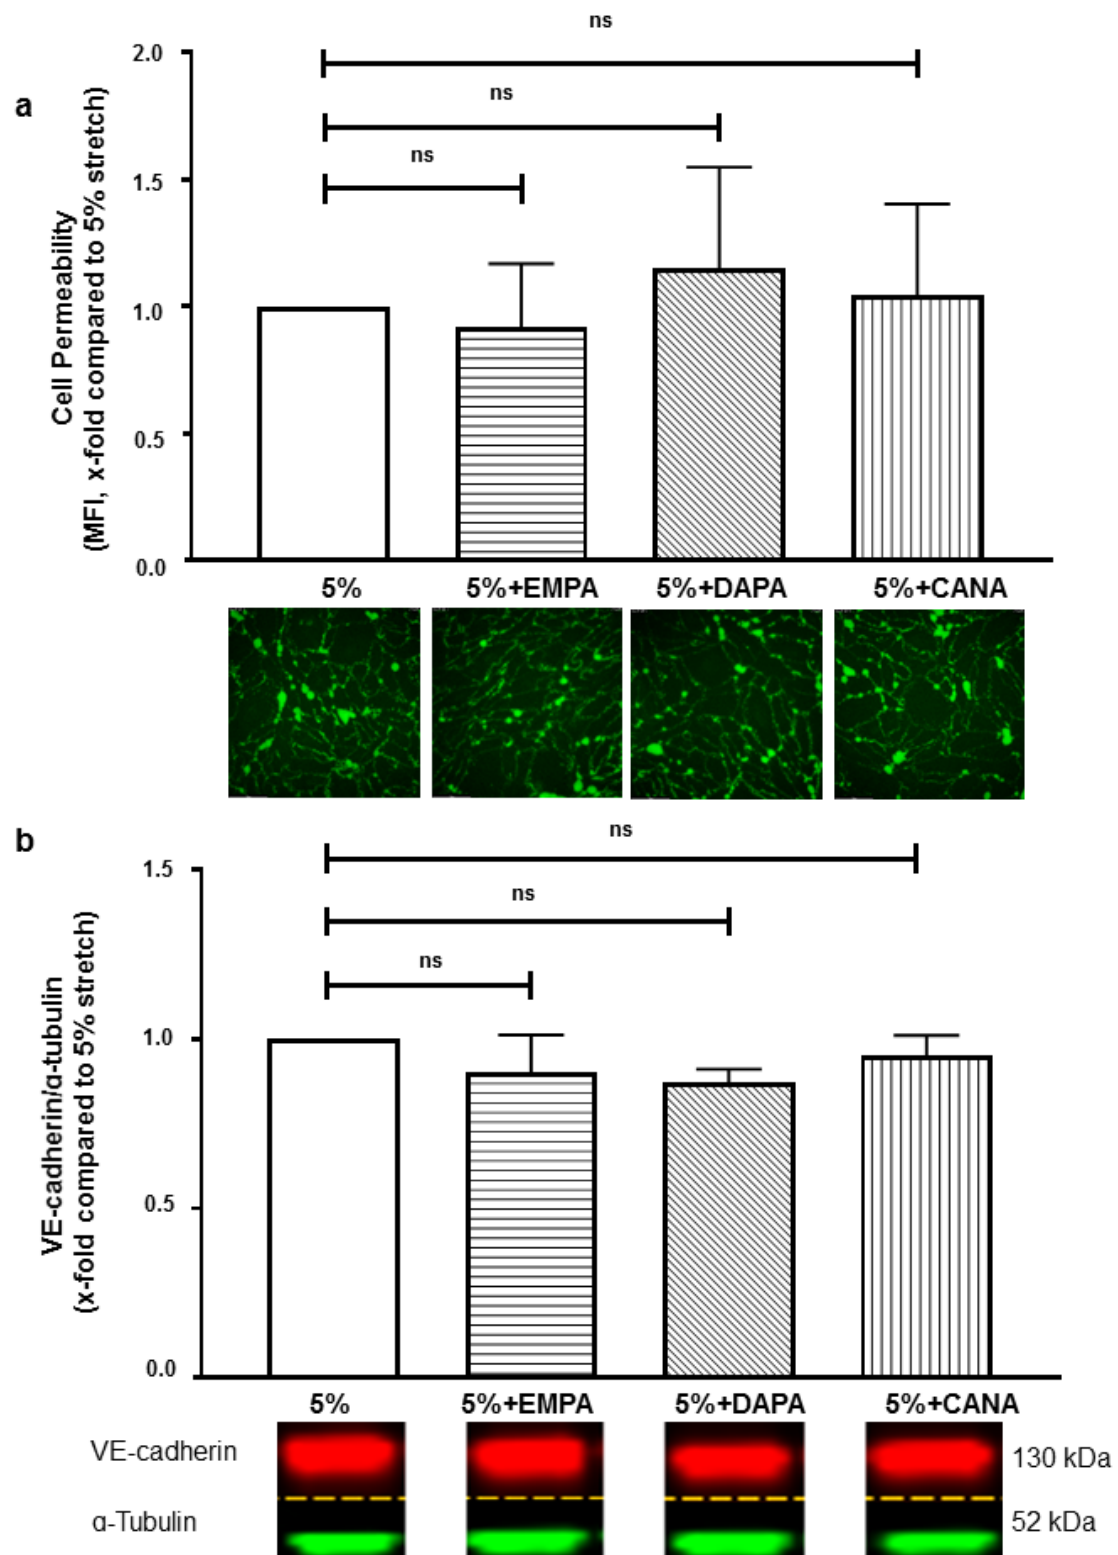

**Figure S1.** SGLT-2i's do not influence the barrier function of HCACEs exposed to 5% stretch. Cells were starved for 18 h by serum reduction before a 2 h pre-incubation with either vehicle (0.06% DMSO) or one SGLT-2i's (1  $\mu$ M EMPA, 1  $\mu$ M DAPA and 3

$\mu$ M CANA), followed by exposure to 5% stretch. Cell permeability and VE-cadherin expression were measured after 24 h. Cell permeability was measured by live cell imaging, and 6 images were taken from each condition in each individual experiments (a, n=5). VE-cadherin levels were quantified with western blot (b, n=4). Representative images and bands are shown in the lower panels and data are presented as mean $\pm$ SD.

## Figure S2

### Cell death measurement

Pyocyanin is a bacterial product from *Pseudomonas aeruginosa* that induces ROS production and apoptosis of cells (Manago *et al.*, 2013). HCAECs were seeded on 6-well plates at a density of 20000 cells/cm<sup>2</sup>, and 50  $\mu$ M pyocyanin was applied for 24 h to induce cell death as positive control. Two wells of the supernatant from cell cultures were combined and centrifuged at 4°C, 10 minutes at 150 g, and stored in -20°C for further analyses.

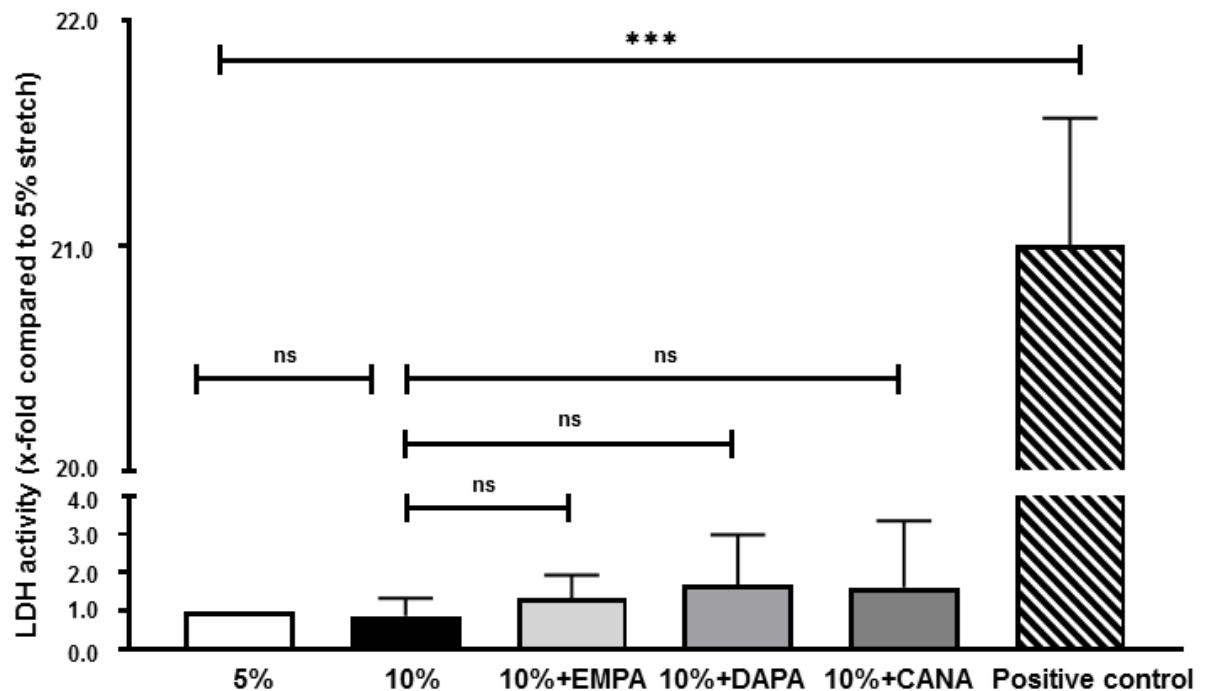

**Figure S2.** 10% stretch does not increase LDH activity of HCAECs. Cells were pre-incubated for 2 h with vehicle or one of the SGLT-2i's (1  $\mu$ M EMPA, 1  $\mu$ M DAPA and 3  $\mu$ M CANA), and were subsequently exposed to 5% stretch plus vehicle, 10% stretch with vehicle or SGLT-2i's for 24 h. Cells treated with 50  $\mu$ M pyocyanin for 24 h were used as positive control. LDH activity was measured photospectrometrically (n=6), and data are presented as mean $\pm$ SD. \*\*\* $P$ <0.001 *vs.* 5% stretch.

### Figure S3

#### Cell permeability measurement with pyocyanin

ROS was induced using pyocyanin following our previous protocol (Uthman *et al.*, 2019). Briefly, cells were seeded on 12-well plates with a density of 10000 cells/cm<sup>2</sup> and incubated with 200  $\mu$ M pyocyanin for 30 min. Cell permeability assays and staining were performed after 6 h.

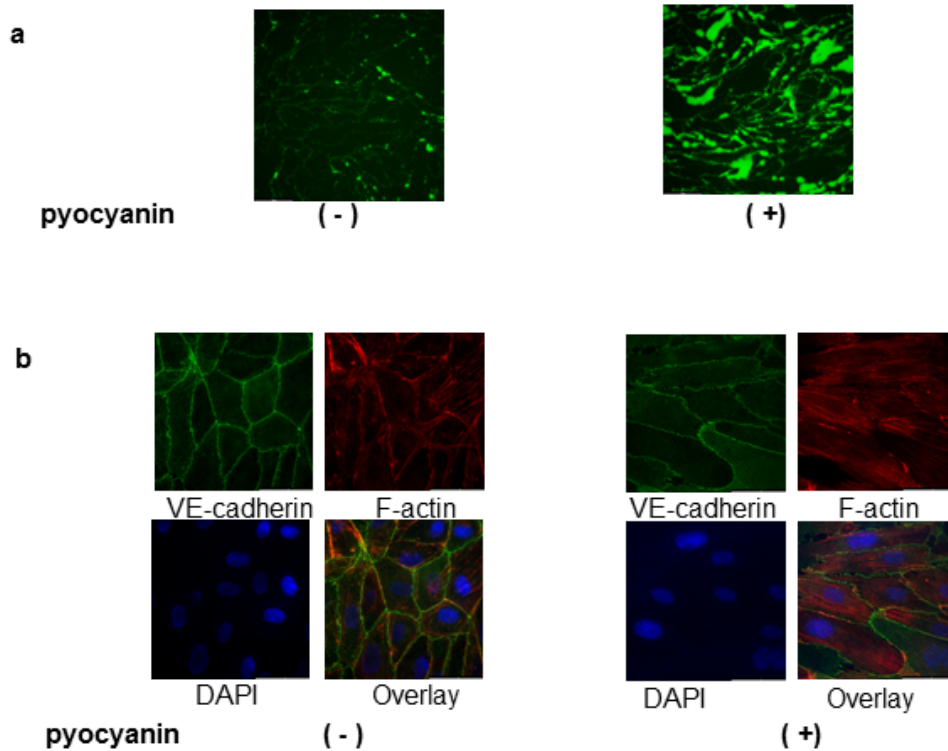

**Figure S3.** 200  $\mu$ M pyocyanin impairs endothelium barrier functions of HCAECs. Cells were treated with 200  $\mu$ M pyocyanin for 30 min. Remaining pyocyanin was removed by PBS washing and cells were incubated for 6h with fresh medium. Cell permeability was visualized with live cell imaging (a, n=5). VE-cadherin expression and F-actin arrangement were visualized with immunofluorescence staining (b, n=3). Representative images are shown.

## References

1. Manago A, Becker K A, Carpinteiro A, Wilker B, Soddemann M, Seitz A P, Edwards M J, et al. (2015). *Pseudomonas aeruginosa* pyocyanin induces neutrophil death via mitochondrial reactive oxygen species and mitochondrial acid sphingomyelinase. *Antioxid Redox Signal*, 22(13), 1097-1110. <http://doi.org/10.1089/ars.2014.5979>
2. Uthman L, Homayr A, Juni R P, Spin E L, Kerindongo R, Boomsma M, Hollmann M W, et al. (2019). Empagliflozin and Dapagliflozin Reduce ROS Generation and Restore NO Bioavailability in Tumor Necrosis Factor alpha-Stimulated Human Coronary Arterial Endothelial Cells. *Cell Physiol Biochem*, 53(5), 865-886. <http://doi.org/10.33594/000000178>
